# Supplementary material
Source: PubMed Central journal article supplement (PMC5764769)
Supplement: NIHMS893222-supplement-supplement_1.pdf [file NIHMS893222-supplement-supplement_1.pdf]

| <b>Supplementary Table 1. Frequency of Each Identified Factor by Clinical Presentation</b> |                         |               |                            |                               |
|--------------------------------------------------------------------------------------------|-------------------------|---------------|----------------------------|-------------------------------|
|                                                                                            | Entire Sample<br>N=1754 | DCIS<br>N=382 | Low Risk Invasive<br>N=466 | Higher Risk Invasive<br>N=906 |
| Diagnosis and Testing<br>N=474                                                             | 27%                     | 32%           | 29%                        | 24%                           |
| Treatment<br>N=391                                                                         | 22%                     | 23%           | 21%                        | 22%                           |
| Uncertainty<br>N=297                                                                       | 17%                     | 16%           | 16%                        | 18%                           |
| Personality Traits and Emotions<br>N=297                                                   | 17%                     | 15%           | 16%                        | 18%                           |
| Communication with a Clinician<br>N=245                                                    | 14%                     | 13%           | 15%                        | 14%                           |
| Current and Future Health<br>N=216                                                         | 12%                     | 10%           | 14%                        | 12%                           |
| Spirituality, Religion, and Faith<br>N=174                                                 | 10%                     | 8%            | 9%                         | 11%                           |
| Family and Personal History<br>N=169                                                       | 10%                     | 11%           | 8%                         | 10%                           |
| Statistics, Research, and Stories<br>of Others<br>N=87                                     | 5%                      | 4%            | 6%                         | 5%                            |
